# Supplementary material for: δ subvariants of SARS-COV-2 in Israel, Qatar and Bahrain: Optimal vaccination as an effective strategy to block viral evolution and control the pandemic
Source: medRxiv preprint, doi:10.1101/2021.11.01.21265445, version 1 (2021-11-09)
Supplement: Acknowledgement table S1 for the GISAID SARS-COV-2 genomes used in this study [file 265445_file03.pdf]

We gratefully acknowledge the following Authors from the Originating laboratories responsible for obtaining the specimens, as well as the Submitting laboratories where the genome data were generated and shared via GISAID, on which this research is based.

All Submitters of data may be contacted directly via [www.gisaid.org](http://www.gisaid.org)

Authors are sorted alphabetically.

Accession ID

Originating Laboratory

Submitting Laboratory

Authors

EPI\_ISL\_4169984, EPI\_ISL\_4169986

Central Virology Laboratory, Israel Ministry of Health

Israel Institute for Biological Research

Adi Beth-Din; Anat Zvi; Inbar Cohen-Gihon; Nir Paran; Ofir Israeli; Yfat Yahalom Ronen

EPI\_ISL\_2153065, EPI\_ISL\_2153066, EPI\_ISL\_5507783, EPI\_ISL\_5507784, EPI\_ISL\_5507785, EPI\_ISL\_5507786, EPI\_ISL\_5507787, EPI\_ISL\_5507788, EPI\_ISL\_5507803, EPI\_ISL\_5507809, EPI\_ISL\_5507818, EPI\_ISL\_5507823, EPI\_ISL\_5507828, EPI\_ISL\_5507836, EPI\_ISL\_5507839, EPI\_ISL\_5507848, EPI\_ISL\_5507853, EPI\_ISL\_5507859, EPI\_ISL\_5507873, EPI\_ISL\_5507884, EPI\_ISL\_5507887, EPI\_ISL\_5507894, EPI\_ISL\_5507902, EPI\_ISL\_5507913, EPI\_ISL\_5507920, EPI\_ISL\_5507925, EPI\_ISL\_5507928, EPI\_ISL\_5507935, EPI\_ISL\_5507949, EPI\_ISL\_5507954, EPI\_ISL\_5507963, EPI\_ISL\_5507968, EPI\_ISL\_5507974, EPI\_ISL\_5507975, EPI\_ISL\_5507976, EPI\_ISL\_5507977, EPI\_ISL\_5507978, EPI\_ISL\_5507979, EPI\_ISL\_5507980, EPI\_ISL\_5507981, EPI\_ISL\_5507982, EPI\_ISL\_5507983, EPI\_ISL\_5508006, EPI\_ISL\_5508007, EPI\_ISL\_5508008, EPI\_ISL\_5508009, EPI\_ISL\_5508010, EPI\_ISL\_5508011, EPI\_ISL\_5508015, EPI\_ISL\_5508016, EPI\_ISL\_5508017, EPI\_ISL\_5508018, EPI\_ISL\_5508019, EPI\_ISL\_5508020, EPI\_ISL\_5508021, EPI\_ISL\_5508022, EPI\_ISL\_5508023, EPI\_ISL\_5508024, EPI\_ISL\_5508025, EPI\_ISL\_5508026, EPI\_ISL\_5508027, EPI\_ISL\_5508028, EPI\_ISL\_5508029, EPI\_ISL\_5508030, EPI\_ISL\_5508031, EPI\_ISL\_5508032, EPI\_ISL\_5508033, EPI\_ISL\_5508034, EPI\_ISL\_5508035, EPI\_ISL\_5508036, EPI\_ISL\_5508037, EPI\_ISL\_5508040, EPI\_ISL\_5508041, EPI\_ISL\_5508042, EPI\_ISL\_5508043, EPI\_ISL\_5508044, EPI\_ISL\_5508045, EPI\_ISL\_5508046, EPI\_ISL\_5508047, EPI\_ISL\_5508048, EPI\_ISL\_5508049, EPI\_ISL\_5508050, EPI\_ISL\_5508051, EPI\_ISL\_5508052, EPI\_ISL\_5508053, EPI\_ISL\_5508054, EPI\_ISL\_5508055, EPI\_ISL\_5508056, EPI\_ISL\_5508057, EPI\_ISL\_5508058, EPI\_ISL\_5508059, EPI\_ISL\_5508060, EPI\_ISL\_5508061, EPI\_ISL\_5508062, EPI\_ISL\_5508063, EPI\_ISL\_5508064, EPI\_ISL\_5508065, EPI\_ISL\_5508066, EPI\_ISL\_5508067, EPI\_ISL\_5508068, EPI\_ISL\_5508069, EPI\_ISL\_5508070, EPI\_ISL\_5508071, EPI\_ISL\_5508072, EPI\_ISL\_5508073, EPI\_ISL\_5508074, EPI\_ISL\_5508075, EPI\_ISL\_5508076, EPI\_ISL\_5508077, EPI\_ISL\_5508078, EPI\_ISL\_5508079, EPI\_ISL\_5508080, EPI\_ISL\_5508081, EPI\_ISL\_5508082, EPI\_ISL\_5508083, EPI\_ISL\_5508084, EPI\_ISL\_5508085, EPI\_ISL\_5508086, EPI\_ISL\_5508087, EPI\_ISL\_5508088, EPI\_ISL\_5508089, EPI\_ISL\_5508090, EPI\_ISL\_5508091, EPI\_ISL\_5508092, EPI\_ISL\_5508093, EPI\_ISL\_5508094, EPI\_ISL\_5508095, EPI\_ISL\_5508096, EPI\_ISL\_5508097, EPI\_ISL\_5508098, EPI\_ISL\_5508099, EPI\_ISL\_5508100, EPI\_ISL\_5508101, EPI\_ISL\_5508102, EPI\_ISL\_5508103, EPI\_ISL\_5508104, EPI\_ISL\_5508105, EPI\_ISL\_5508106, EPI\_ISL\_5508107, EPI\_ISL\_5508108, EPI\_ISL\_5508109, EPI\_ISL\_5508110, EPI\_ISL\_5508111, EPI\_ISL\_5508112, EPI\_ISL\_5508113, EPI\_ISL\_5508114, EPI\_ISL\_5508115, EPI\_ISL\_5508116, EPI\_ISL\_5508117, EPI\_ISL\_5508118, EPI\_ISL\_5508119, EPI\_ISL\_5508120, EPI\_ISL\_5508121, EPI\_ISL\_5508122, EPI\_ISL\_5508123, EPI\_ISL\_5508124, EPI\_ISL\_5508125, EPI\_ISL\_5508126, EPI\_ISL\_5508127, EPI\_ISL\_5508128, EPI\_ISL\_5508129, EPI\_ISL\_5508130, EPI\_ISL\_5508131, EPI\_ISL\_5508132, EPI\_ISL\_5508133, EPI\_ISL\_5508134, EPI\_ISL\_5508135, EPI\_ISL\_5508136, EPI\_ISL\_5508137, EPI\_ISL\_5508138, EPI\_ISL\_5508139, EPI\_ISL\_5508140, EPI\_ISL\_5508141, EPI\_ISL\_5508142, EPI\_ISL\_5508143, EPI\_ISL\_5508144, EPI\_ISL\_5508145, EPI\_ISL\_5508146, EPI\_ISL\_5508147, EPI\_ISL\_5508148, EPI\_ISL\_5508149, EPI\_ISL\_5508150, EPI\_ISL\_5508151, EPI\_ISL\_5508152, EPI\_ISL\_5508153, EPI\_ISL\_5508154, EPI\_ISL\_5508155, EPI\_ISL\_5508156, EPI\_ISL\_5508157, EPI\_ISL\_5508158, EPI\_ISL\_5508159, EPI\_ISL\_5508160, EPI\_ISL\_5508161, EPI\_ISL\_5508162, EPI\_ISL\_5508163, EPI\_ISL\_5508164, EPI\_ISL\_5508165, EPI\_ISL\_5508166, EPI\_ISL\_5508167, EPI\_ISL\_5508168, EPI\_ISL\_5508169, EPI\_ISL\_5508170, EPI\_ISL\_5508171, EPI\_ISL\_5508172, EPI\_ISL\_5508173, EPI\_ISL\_5508174, EPI\_ISL\_5508175, EPI\_ISL\_5508176, EPI\_ISL\_5508177, EPI\_ISL\_5508178, EPI\_ISL\_5508179, EPI\_ISL\_5508180, EPI\_ISL\_5508181, EPI\_ISL\_5508182, EPI\_ISL\_5508183, EPI\_ISL\_5508184, EPI\_ISL\_5508185, EPI\_ISL\_5508186, EPI\_ISL\_5508187, EPI\_ISL\_5508188, EPI\_ISL\_5508189, EPI\_ISL\_5508190, EPI\_ISL\_5508191, EPI\_ISL\_5508192, EPI\_ISL\_5508193, EPI\_ISL\_5508194, EPI\_ISL\_5508195, EPI\_ISL\_5508196, EPI\_ISL\_5508197, EPI\_ISL\_5508198, EPI\_ISL\_5508199, EPI\_ISL\_5508200, EPI\_ISL\_5508201, EPI\_ISL\_5508202, EPI\_ISL\_5508203, EPI\_ISL\_5508204, EPI\_ISL\_5508205, EPI\_ISL\_5508206, EPI\_ISL\_5508207, EPI\_ISL\_5508208, EPI\_ISL\_5508209, EPI\_ISL\_5508210, EPI\_ISL\_5508211, EPI\_ISL\_5508212, EPI\_ISL\_5508213, EPI\_ISL\_5508214, EPI\_ISL\_5508215, EPI\_ISL\_5508216, EPI\_ISL\_5508217, EPI\_ISL\_5508218, EPI\_ISL\_5508219, EPI\_ISL\_5508220, EPI\_ISL\_5508221, EPI\_ISL\_5508222, EPI\_ISL\_5508223, EPI\_ISL\_5508224, EPI\_ISL\_5508225, EPI\_ISL\_5508226, EPI\_ISL\_5508227, EPI\_ISL\_5508228, EPI\_ISL\_5508229, EPI\_ISL\_5508230, EPI\_ISL\_5508231, EPI\_ISL\_5508232, EPI\_ISL\_5508233, EPI\_ISL\_5508234, EPI\_ISL\_5508235, EPI\_ISL\_5508236, EPI\_ISL\_5508237, EPI\_ISL\_5508238, EPI\_ISL\_5508239, EPI\_ISL\_5508240, EPI\_ISL\_5508241, EPI\_ISL\_5508242, EPI\_ISL\_5508243, EPI\_ISL\_5508244, EPI\_ISL\_5508245, EPI\_ISL\_5508246, EPI\_ISL\_5508247, EPI\_ISL\_5508248, EPI\_ISL\_5508249, EPI\_ISL\_5508250, EPI\_ISL\_5508251, EPI\_ISL\_5508252, EPI\_ISL\_5508253, EPI\_ISL\_5508254, EPI\_ISL\_5508255, EPI\_ISL\_5508256, EPI\_ISL\_5508257, EPI\_ISL\_5508258, EPI\_ISL\_5508259, EPI\_ISL\_5508260, EPI\_ISL\_5508261, EPI\_ISL\_5508262, EPI\_ISL\_5508263, EPI\_ISL\_5508264, EPI\_ISL\_5508265, EPI\_ISL\_5508266, EPI\_ISL\_5508267, EPI\_ISL\_5508268, EPI\_ISL\_5508269, EPI\_ISL\_5508270, EPI\_ISL\_5508271, EPI\_ISL\_5508272, EPI\_ISL\_5508273, EPI\_ISL\_5508274, EPI\_ISL\_5508275, EPI\_ISL\_5508276, EPI\_ISL\_5508277, EPI\_ISL\_5508278, EPI\_ISL\_5508279, EPI\_ISL\_5508280, EPI\_ISL\_5508281, EPI\_ISL\_5508282, EPI\_ISL\_5508283, EPI\_ISL\_5508284, EPI\_ISL\_5508285, EPI\_ISL\_5508286, EPI\_ISL\_5508287, EPI\_ISL\_5508288, EPI\_ISL\_5508289, EPI\_ISL\_5508290, EPI\_ISL\_5508291, EPI\_ISL\_5508292, EPI\_ISL\_5508293, EPI\_ISL\_5508294, EPI\_ISL\_5508295, EPI\_ISL\_5508296, EPI\_ISL\_5508297, EPI\_ISL\_5508298, EPI\_ISL\_5508299, EPI\_ISL\_5508300, EPI\_ISL\_5508301, EPI\_ISL\_5508302, EPI\_ISL\_5508303, EPI\_ISL\_5508304, EPI\_ISL\_5508305, EPI\_ISL\_5508306, EPI\_ISL\_5508307, EPI\_ISL\_5508308, EPI\_ISL\_5508309, EPI\_ISL\_5508310, EPI\_ISL\_5508311, EPI\_ISL\_5508312, EPI\_ISL\_5508313, EPI\_ISL\_5508314, EPI\_ISL\_5508315, EPI\_ISL\_5508316, EPI\_ISL\_5508317, EPI\_ISL\_5508318, EPI\_ISL\_5508319, EPI\_ISL\_5508320, EPI\_ISL\_5508321, EPI\_ISL\_5508322, EPI\_ISL\_5508323, EPI\_ISL\_5508324, EPI\_ISL\_5508325, EPI\_ISL\_5508326, EPI\_ISL\_5508327, EPI\_ISL\_5508328, EPI\_ISL\_5508329, EPI\_ISL\_5508330, EPI\_ISL\_5508331, EPI\_ISL\_5508332, EPI\_ISL\_5508333, EPI\_ISL\_5508334, EPI\_ISL\_5508335, EPI\_ISL\_5508336, EPI\_ISL\_5508337, EPI\_ISL\_5508338, EPI\_ISL\_5508339, EPI\_ISL\_5508340, EPI\_ISL\_5508341, EPI\_ISL\_5508342, EPI\_ISL\_5508343, EPI\_ISL\_5508344, EPI\_ISL\_5508345, EPI\_ISL\_5508346, EPI\_ISL\_5508347, EPI\_ISL\_5508348, EPI\_ISL\_5508349, EPI\_ISL\_5508350, EPI\_ISL\_5508351, EPI\_ISL\_5508352, EPI\_ISL\_5508353, EPI\_ISL\_5508354, EPI\_ISL\_5508355, EPI\_ISL\_5508356, EPI\_ISL\_5508357, EPI\_ISL\_5508358, EPI\_ISL\_5508359, EPI\_ISL\_5508360, EPI\_ISL\_5508361, EPI\_ISL\_5508362, EPI\_ISL\_5508363, EPI\_ISL\_5508364, EPI\_ISL\_5508365, EPI\_ISL\_5508366, EPI\_ISL\_5508367, EPI\_ISL\_5508368, EPI\_ISL\_5508369, EPI\_ISL\_5508370, EPI\_ISL\_5508371, EPI\_ISL\_5508372, EPI\_ISL\_5508373, EPI\_ISL\_5508374, EPI\_ISL\_5508375, EPI\_ISL\_5508376, EPI\_ISL\_5508377, EPI\_ISL\_5508378, EPI\_ISL\_5508379, EPI\_ISL\_5508380, EPI\_ISL\_5508381, EPI\_ISL\_5508382, EPI\_ISL\_5508383, EPI\_ISL\_5508384, EPI\_ISL\_5508385, EPI\_ISL\_5508386, EPI\_ISL\_5508387, EPI\_ISL\_5508388, EPI\_ISL\_5508389, EPI\_ISL\_5508390, EPI\_ISL\_5508391, EPI\_ISL\_5508392, EPI\_ISL\_5508393, EPI\_ISL\_5508394, EPI\_ISL\_5508395, EPI\_ISL\_5508396, EPI\_ISL\_5508397, EPI\_ISL\_5508398, EPI\_ISL\_5508399, EPI\_ISL\_5508400, EPI\_ISL\_5508401, EPI\_ISL\_5508402, EPI\_ISL\_5508403, EPI\_ISL\_5508404, EPI\_ISL\_5508405, EPI\_ISL\_5508406, EPI\_ISL\_5508407, EPI\_ISL\_5508408, EPI\_ISL\_5508409, EPI\_ISL\_5508410, EPI\_ISL\_5508411, EPI\_ISL\_5508412, EPI\_ISL\_5508413, EPI\_ISL\_5508414, EPI\_ISL\_5508415, EPI\_ISL\_5508416, EPI\_ISL\_5508417, EPI\_ISL\_5508418, EPI\_ISL\_5508419, EPI\_ISL\_5508420, EPI\_ISL\_5508421, EPI\_ISL\_5508422, EPI\_ISL\_5508423, EPI\_ISL\_5508424, EPI\_ISL\_5508425, EPI\_ISL\_5508426, EPI\_ISL\_5508427, EPI\_ISL\_5508428, EPI\_ISL\_5508429, EPI\_ISL\_5508430, EPI\_ISL\_5508431, EPI\_ISL\_5508432, EPI\_ISL\_5508433, EPI\_ISL\_5508434, EPI\_ISL\_5508435, EPI\_ISL\_5508436, EPI\_ISL\_5508437, EPI\_ISL\_5508438, EPI\_ISL\_5508439, EPI\_ISL\_5508440, EPI\_ISL\_5508441, EPI\_ISL\_5508442, EPI\_ISL\_5508443, EPI\_ISL\_5508444, EPI\_ISL\_5508445, EPI\_ISL\_5508446, EPI\_ISL\_5508447, EPI\_ISL\_5508448, EPI\_ISL\_5508449, EPI\_ISL\_5508450, EPI\_ISL\_5508451, EPI\_ISL\_5508452, EPI\_ISL\_5508453, EPI\_ISL\_5508454, EPI\_ISL\_5508455, EPI\_ISL\_5508456, EPI\_ISL\_5508457, EPI\_ISL\_5508458, EPI\_ISL\_5508459, EPI\_ISL\_5508460, EPI\_ISL\_5508461, EPI\_ISL\_5508462, EPI\_ISL\_5508463, EPI\_ISL\_5508464, EPI\_ISL\_5508465, EPI\_ISL\_5508466, EPI\_ISL\_5508467, EPI\_ISL\_5508468, EPI\_ISL\_5508469, EPI\_ISL\_5508470, EPI\_ISL\_5508471, EPI\_ISL\_5508472, EPI\_ISL\_5508473, EPI\_ISL\_5508474, EPI\_ISL\_5508475, EPI\_ISL\_5508476, EPI\_ISL\_5508477, EPI\_ISL\_5508478, EPI\_ISL\_5508479, EPI\_ISL\_5508480, EPI\_ISL\_5508481, EPI\_ISL\_5508482, EPI\_ISL\_5508483, EPI\_ISL\_5508484, EPI\_ISL\_5508485, EPI\_ISL\_5508486, EPI\_ISL\_5508487, EPI\_ISL\_5508488, EPI\_ISL\_5508489, EPI\_ISL\_5508490, EPI\_ISL\_5508491, EPI\_ISL\_5508492, EPI\_ISL\_5508493, EPI\_ISL\_5508494, EPI\_ISL\_5508495, EPI\_ISL\_5508496, EPI\_ISL\_5508497, EPI\_ISL\_5508498, EPI\_ISL\_5508499, EPI\_ISL\_5508500, EPI\_ISL\_5508501, EPI\_ISL\_5508502, EPI\_ISL\_5508503, EPI\_ISL\_5508504, EPI\_ISL\_5508505, EPI\_ISL\_5508506, EPI\_ISL\_5508507, EPI\_ISL\_5508508, EPI\_ISL\_5508509, EPI\_ISL\_5508510, EPI\_ISL\_5508511, EPI\_ISL\_5508512, EPI\_ISL\_5508513, EPI\_ISL\_5508514, EPI\_ISL\_5508515, EPI\_ISL\_5508516, EPI\_ISL\_5508517, EPI\_ISL\_5508518, EPI\_ISL\_5508519, EPI\_ISL\_5508520, EPI\_ISL\_5508521, EPI\_ISL\_5508522, EPI\_ISL\_5508523, EPI\_ISL\_5508524, EPI\_ISL\_5508525, EPI\_ISL\_5508526, EPI\_ISL\_5508527, EPI\_ISL\_5508528, EPI\_ISL\_5508529, EPI\_ISL\_5508530, EPI\_ISL\_5508531, EPI\_ISL\_5508532, EPI\_ISL\_5508533, EPI\_ISL\_5508534, EPI\_ISL\_5508535, EPI\_ISL\_5508536, EPI\_ISL\_5508537, EPI\_ISL\_5508538, EPI\_ISL\_5508539, EPI\_ISL\_5508540, EPI\_ISL\_5508541, EPI\_ISL\_5508542, EPI\_ISL\_5508543, EPI\_ISL\_5508544, EPI\_ISL\_5508545, EPI\_ISL\_5508546, EPI\_ISL\_5508547, EPI\_ISL\_5508548, EPI\_ISL\_5508549, EPI\_ISL\_5508550, EPI\_ISL\_5508551, EPI\_ISL\_5508552, EPI\_ISL\_5508553, EPI\_ISL\_5508554, EPI\_ISL\_5508555, EPI\_ISL\_5508556, EPI\_ISL\_5508557, EPI\_ISL\_5508558, EPI\_ISL\_5508559, EPI\_ISL\_5508560, EPI\_ISL\_5508561, EPI\_ISL\_5508562, EPI\_ISL\_5508563, EPI\_ISL\_5508564, EPI\_ISL\_5508565, EPI\_ISL\_5508566, EPI\_ISL\_5508567, EPI\_ISL\_5508568, EPI\_ISL\_5508569, EPI\_ISL\_5508570, EPI\_ISL\_5508571, EPI\_ISL\_5508572, EPI\_ISL\_5508573, EPI\_ISL\_5508574, EPI\_ISL\_5508575, EPI\_ISL\_5508576, EPI\_ISL\_5508577, EPI\_ISL\_5508578, EPI\_ISL\_5508579, EPI\_ISL\_5508580, EPI\_ISL\_5508581, EPI\_ISL\_5508582, EPI\_ISL\_5508583, EPI\_ISL\_5508584, EPI\_ISL\_5508585, EPI\_ISL\_5508586, EPI\_ISL\_5508587, EPI\_ISL\_5508588, EPI\_ISL\_5508589, EPI\_ISL\_5508590, EPI\_ISL\_5508591, EPI\_ISL\_5508592, EPI\_ISL\_5508593, EPI\_ISL\_5508594, EPI\_ISL\_5508595, EPI\_ISL\_5508596, EPI\_ISL\_5508597, EPI\_ISL\_5508598, EPI\_ISL\_5508599, EPI\_ISL\_5508600, EPI\_ISL\_5508601, EPI\_ISL\_5508602, EPI\_ISL\_5508603, EPI\_ISL\_5508604, EPI\_ISL\_5508605, EPI\_ISL\_5508606, EPI\_ISL\_5508607, EPI\_ISL\_5508608, EPI\_ISL\_5508609, EPI\_ISL\_5508610, EPI\_ISL\_5508611, EPI\_ISL\_5508612, EPI\_ISL\_5508613, EPI\_ISL\_5508614, EPI\_ISL\_5508615, EPI\_ISL\_5508616, EPI\_ISL\_5508617, EPI\_ISL\_5508618, EPI\_ISL\_5508619, EPI\_ISL\_5508620, EPI\_ISL\_5508621, EPI\_ISL\_5508622, EPI\_ISL\_5508623, EPI\_ISL\_5508624, EPI\_ISL\_5508625, EPI\_ISL\_5508626, EPI\_ISL\_5508627, EPI\_ISL\_5508628, EPI\_ISL\_5508629, EPI\_ISL\_5508630, EPI\_ISL\_5508631, EPI\_ISL\_5508632, EPI\_ISL\_5508633, EPI\_ISL\_5508634, EPI\_ISL\_5508635, EPI\_ISL\_5508636, EPI\_ISL\_5508637, EPI\_ISL\_5508638, EPI\_ISL\_5508639, EPI\_ISL\_5508640, EPI\_ISL\_5508641, EPI\_ISL\_5508642, EPI\_ISL\_5508643, EPI\_ISL\_5508644, EPI\_ISL\_5508645, EPI\_ISL\_5508646, EPI\_ISL\_5508647, EPI\_ISL\_5508648, EPI\_ISL\_5508649, EPI\_ISL\_5508650, EPI\_ISL\_5508651, EPI\_ISL\_5508652, EPI\_ISL\_5508653, EPI\_ISL\_5508654, EPI\_ISL\_5508655, EPI\_ISL\_5508656, EPI\_ISL\_5508657, EPI\_ISL\_5508658, EPI\_ISL\_5508659, EPI\_ISL\_5508660, EPI\_ISL\_5508661, EPI\_ISL\_5508662, EPI\_ISL\_5508663, EPI\_ISL\_5508664, EPI\_ISL\_5508665, EPI\_ISL\_5508666, EPI\_ISL\_5508667, EPI\_ISL\_5508668, EPI\_ISL\_5508669, EPI\_ISL\_5508670, EPI\_ISL\_5508671, EPI\_ISL\_5508672, EPI\_ISL\_5508673, EPI\_ISL\_5508674, EPI\_ISL\_5508675, EPI\_ISL\_5508676, EPI\_ISL\_5508677, EPI\_ISL\_5508678, EPI\_ISL\_5508679, EPI\_ISL\_5508680, EPI\_ISL\_5508681, EPI\_ISL\_5508682, EPI\_ISL\_5508683, EPI\_ISL\_5508684, EPI\_ISL\_5508685, EPI\_ISL\_5508686, EPI\_ISL\_5508687, EPI\_ISL\_5508688, EPI\_ISL\_5508689, EPI\_ISL\_5508690, EPI\_ISL\_5508691, EPI\_ISL\_5508692, EPI\_ISL\_5508693, EPI\_ISL\_5508694, EPI\_ISL\_5508695, EPI\_ISL\_5508696, EPI\_ISL\_5508697, EPI\_ISL\_5508698, EPI\_ISL\_5508699, EPI\_ISL\_5508700, EPI\_ISL\_5508701, EPI\_ISL\_5508702, EPI\_ISL\_5508703, EPI\_ISL\_5508704, EPI\_ISL\_5508705, EPI\_ISL\_5508706, EPI\_ISL\_5508707, EPI\_ISL\_5508708, EPI\_ISL\_5508709, EPI\_ISL\_5508710, EPI\_ISL\_5508711, EPI\_ISL\_5508712, EPI\_ISL\_5508713, EPI\_ISL\_5508714, EPI\_ISL\_5508715, EPI\_ISL\_5508716, EPI\_ISL\_5508717, EPI\_ISL\_5508718, EPI\_ISL\_5508719, EPI\_ISL\_5508720, EPI\_ISL\_5508721, EPI\_ISL\_5508722, EPI\_ISL\_5508723, EPI\_ISL\_5508724, EPI\_ISL\_5508725, EPI\_ISL\_5508726, EPI\_ISL\_5508727, EPI\_ISL\_5508728, EPI\_ISL\_5508729, EPI\_ISL\_5508730, EPI\_ISL\_5508731, EPI\_ISL\_5508732, EPI\_ISL\_5508733, EPI\_ISL\_5508734, EPI\_ISL\_5508735, EPI\_ISL\_5508736, EPI\_ISL\_5508737, EPI\_ISL\_5508738, EPI\_ISL\_5508739, EPI\_ISL\_5508740, EPI\_ISL\_5508741, EPI\_ISL\_5508742, EPI\_ISL\_5508743, EPI\_ISL\_5508744, EPI\_ISL\_5508745, EPI\_ISL\_5508746, EPI\_ISL\_5508747, EPI\_ISL\_5508748, EPI\_ISL\_5508749, EPI\_ISL\_5508750, EPI\_ISL\_5508751, EPI\_ISL\_5508752, EPI\_ISL\_5508753, EPI\_ISL\_5508754, EPI\_ISL\_5508755, EPI\_ISL\_5508756, EPI\_ISL\_5508757, EPI\_ISL\_5508758, EPI\_ISL\_5508759, EPI\_ISL\_5508760, EPI\_ISL\_5508761, EPI\_ISL\_5508762, EPI\_ISL\_5508763, EPI\_ISL\_5508764, EPI\_ISL\_5508765, EPI\_ISL\_5508766, EPI\_ISL\_5508767, EPI\_ISL\_5508768, EPI\_ISL\_5508769, EPI\_ISL\_5508770, EPI\_ISL\_5508771, EPI\_ISL\_5508772, EPI\_ISL\_5508773, EPI\_ISL\_5508774, EPI\_ISL\_5508775, EPI\_ISL\_5508776, EPI\_ISL\_5508777, EPI\_ISL\_5508778, EPI\_ISL\_5508779, EPI\_ISL\_5508780, EPI\_ISL\_5508781, EPI\_ISL\_5508782, EPI\_ISL\_5508783, EPI\_ISL\_5508784, EPI\_ISL\_5508785, EPI\_ISL\_5508786, EPI\_ISL\_5508787, EPI\_ISL\_5508788, EPI\_ISL\_5508789, EPI\_ISL\_5508790, EPI\_ISL\_5508791, EPI\_ISL\_5508792, EPI\_ISL\_5508793, EPI\_ISL\_5508794, EPI\_ISL\_5508795, EPI\_ISL\_5508796, EPI\_ISL\_5508797, EPI\_ISL\_5508798, EPI\_ISL\_5508799, EPI\_ISL\_5508800, EPI\_ISL\_5508801, EPI\_ISL\_5508802, EPI\_ISL\_5508803, EPI\_ISL\_5508804, EPI\_ISL\_5508805, EPI\_ISL\_5508806, EPI\_ISL\_5508807, EPI\_ISL\_5508808, EPI\_ISL\_5508809, EPI\_ISL\_5508810, EPI\_ISL\_5508811, EPI\_ISL\_5508812, EPI\_ISL\_5508813, EPI\_ISL\_5508814, EPI\_ISL\_5508815, EPI\_ISL\_5508816, EPI\_ISL\_5508817, EPI\_ISL\_5508818, EPI\_ISL\_5508819, EPI\_ISL\_5508820, EPI\_ISL\_5508821, EPI\_ISL\_5508822, EPI\_ISL\_5508823, EPI\_ISL\_5508824, EPI\_ISL\_5508825, EPI\_ISL\_5508826, EPI\_ISL\_5508827, EPI\_ISL\_5508828, EPI\_ISL\_5508829, EPI\_ISL\_5508830, EPI\_ISL\_5508831, EPI\_ISL\_5508832, EPI\_ISL\_5508833, EPI\_ISL\_5508834, EPI\_ISL\_5508835, EPI\_ISL\_5508836, EPI\_ISL\_5508837, EPI\_ISL\_5508838, EPI\_ISL\_5508839, EPI\_ISL\_5508840, EPI\_ISL\_5508841, EPI\_ISL\_5508842, EPI\_ISL\_5508843, EPI\_ISL\_5508844, EPI\_ISL\_5508845, EPI\_ISL\_5508846, EPI\_ISL\_5508847, EPI\_ISL\_5508848, EPI\_ISL\_5508849, EPI\_ISL\_5508850, EPI\_ISL\_5508851, EPI\_ISL\_5508852, EPI\_ISL\_5508853, EPI\_ISL\_5508854, EPI\_ISL\_5508855, EPI\_ISL\_5508856, EPI\_ISL\_5508857, EPI\_ISL\_5508858, EPI\_ISL\_5508859, EPI\_ISL\_5508860, EPI\_ISL\_5508861, EPI\_ISL\_5508862, EPI\_ISL\_5508863, EPI\_ISL\_5508864, EPI\_ISL\_5508865, EPI\_ISL\_5508866, EPI\_ISL\_5508867, EPI\_ISL\_5508868, EPI\_ISL\_5508869, EPI\_ISL\_5508870, EPI\_ISL\_5508871, EPI\_ISL\_5508872, EPI\_ISL\_5508873, EPI\_ISL\_5508874, EPI\_ISL\_5508875, EPI\_ISL\_5508876, EPI\_ISL\_5508877, EPI\_ISL\_5508878, EPI\_ISL\_5508879, EPI\_ISL\_5508880, EPI\_ISL\_5508881, EPI\_ISL\_5508882, EPI\_ISL\_5508883, EPI\_ISL\_5508884, EPI\_ISL\_5508885, EPI\_ISL\_5508886, EPI\_ISL\_5508887, EPI\_ISL\_5508888, EPI\_ISL\_5508889, EPI\_ISL\_5508890, EPI\_ISL\_5508891, EPI\_ISL\_5508892, EPI\_ISL\_5508893, EPI\_ISL\_5508894, EPI\_ISL\_5508895, EPI\_ISL\_5508896, EPI\_ISL\_5508897, EPI\_ISL\_5508898, EPI\_ISL\_5508899, EPI\_ISL\_5508900, EPI\_ISL\_5508901, EPI\_ISL\_5508902, EPI\_ISL\_5508903, EPI\_ISL\_5508904, EPI\_ISL\_5508905, EPI\_ISL\_5508906, EPI\_ISL\_5508907, EPI\_ISL\_5508908, EPI\_ISL\_5508909, EPI\_ISL\_5508910, EPI\_ISL\_55



|                 |                                     |                                                      |                                                                                                                                                                                                                  |
|-----------------|-------------------------------------|------------------------------------------------------|------------------------------------------------------------------------------------------------------------------------------------------------------------------------------------------------------------------|
| see above       | Israel Central Virology laboratory  | Israel National Consortium for SARS-CoV-2 sequencing | Dana Bar-Ilan; Danit Sofer; Efrat Dahan Bucris; Efrat Glick-Saar; Ella Mendelson; Gideon Rechavi; Michal Mandelboim; Miranda Geva; Neta Zuckerman; Netanel Abu; Omer Asraf; Omri Nayshool; Oran Erster; Orna Mor |
| EPI_ISL_4505006 | National Institute of Public Health | State Veterinary Institute Prague                    | Alexander Nagy; Helena Jirincova; Jaromira Vecerova; Lenka Cernikova; Martina Stara; Timotej Suri                                                                                                                |
| EPI_ISL_3115140 | Platform BIS UZA/UAntwerpen         | Labo Klinische Biologie, UZA                         | Basil Britto Xavier; Christine Lammens; Ines Verbesselt; Jasmine Coppens; Kathleen Holemans; Marie Le Mercier; Veerle Matheeuissen                                                                               |

|           |                                     |                                     |                                                                                                                                                                   |
|-----------|-------------------------------------|-------------------------------------|-------------------------------------------------------------------------------------------------------------------------------------------------------------------|
| see above | Shamir Medical Center (Asaf Harofe) | Shamir Medical Center (Asaf Harofe) | Abu Hamad Ramzia; Adina Bar Chaim; Anna Vishnevsky; Chen Weiner; Netta Zuckerman; Nir Rainy; Patricia Benveniste-Lekovitz; Reut Sorek Abramovich; Yevgeni Yegorov |
|-----------|-------------------------------------|-------------------------------------|-------------------------------------------------------------------------------------------------------------------------------------------------------------------|
