# Supplementary material for: δ subvariants of SARS-COV-2 in Israel, Qatar and Bahrain: Optimal vaccination as an effective strategy to block viral evolution and control the pandemic
Source: bioRxiv or medRxiv preprint supplement (doi:10.1101/2021.11.01.21265445), 2021-11-09
Supplement: Supplementary file [file media-3.pdf]

We gratefully acknowledge the following Authors from the Originating laboratories responsible for obtaining the specimens, as well as the Submitting laboratories where the genome data were generated and shared via GISAID, on which this research is based.

All Submitters of data may be contacted directly via [www.gisaid.org](http://www.gisaid.org)

Authors are sorted alphabetically.

| Accession ID                                                                                                                                                                                                                                                                                                                                                                                                                                                                                                                                                                                                                                                                                                                                                                                                                                                                                                                                                                                                                                                                                                                                                                                                                                                                                                                                                                                                                                                                                                                                                                                                                                                                                                                                                                                                                                                                                                                                                                                                                                                                                                                                                                                                                                                                                                                                                                                                                                                                                                                                                                                                                                                                                                                                                                                                                                                                                                                                                                                                                                                                                                                                                                                                                                                                                                                                                                                                                                                                                                                                                                                                                                                                                                                                                                                                                                                                                                                                                                                                                                                                                                                                                                                                                                                                                                                                                                                                                                                                                                                                                                                                                                                                                                                                                                                                                                                                                                                                                                                                                                                                                                                                                                                                                                                                                                                                                                                                                                                                                                                                                                                                                                                                    | Originating Laboratory                                     | Submitting Laboratory                                      | Authors                                                                                  |
|---------------------------------------------------------------------------------------------------------------------------------------------------------------------------------------------------------------------------------------------------------------------------------------------------------------------------------------------------------------------------------------------------------------------------------------------------------------------------------------------------------------------------------------------------------------------------------------------------------------------------------------------------------------------------------------------------------------------------------------------------------------------------------------------------------------------------------------------------------------------------------------------------------------------------------------------------------------------------------------------------------------------------------------------------------------------------------------------------------------------------------------------------------------------------------------------------------------------------------------------------------------------------------------------------------------------------------------------------------------------------------------------------------------------------------------------------------------------------------------------------------------------------------------------------------------------------------------------------------------------------------------------------------------------------------------------------------------------------------------------------------------------------------------------------------------------------------------------------------------------------------------------------------------------------------------------------------------------------------------------------------------------------------------------------------------------------------------------------------------------------------------------------------------------------------------------------------------------------------------------------------------------------------------------------------------------------------------------------------------------------------------------------------------------------------------------------------------------------------------------------------------------------------------------------------------------------------------------------------------------------------------------------------------------------------------------------------------------------------------------------------------------------------------------------------------------------------------------------------------------------------------------------------------------------------------------------------------------------------------------------------------------------------------------------------------------------------------------------------------------------------------------------------------------------------------------------------------------------------------------------------------------------------------------------------------------------------------------------------------------------------------------------------------------------------------------------------------------------------------------------------------------------------------------------------------------------------------------------------------------------------------------------------------------------------------------------------------------------------------------------------------------------------------------------------------------------------------------------------------------------------------------------------------------------------------------------------------------------------------------------------------------------------------------------------------------------------------------------------------------------------------------------------------------------------------------------------------------------------------------------------------------------------------------------------------------------------------------------------------------------------------------------------------------------------------------------------------------------------------------------------------------------------------------------------------------------------------------------------------------------------------------------------------------------------------------------------------------------------------------------------------------------------------------------------------------------------------------------------------------------------------------------------------------------------------------------------------------------------------------------------------------------------------------------------------------------------------------------------------------------------------------------------------------------------------------------------------------------------------------------------------------------------------------------------------------------------------------------------------------------------------------------------------------------------------------------------------------------------------------------------------------------------------------------------------------------------------------------------------------------------------------------------------------------------|------------------------------------------------------------|------------------------------------------------------------|------------------------------------------------------------------------------------------|
| EPI_ISL_4105092, EPI_ISL_4105093, EPI_ISL_4105094, EPI_ISL_4105095, EPI_ISL_4105096, EPI_ISL_4105097, EPI_ISL_4105098, EPI_ISL_4105099, EPI_ISL_4105100, EPI_ISL_4105101, EPI_ISL_4105102, EPI_ISL_4105103, EPI_ISL_4105104, EPI_ISL_4105105, EPI_ISL_4105106, EPI_ISL_4105107, EPI_ISL_4105108, EPI_ISL_4105109, EPI_ISL_4105110, EPI_ISL_4105111, EPI_ISL_4105112, EPI_ISL_4105113, EPI_ISL_4105114, EPI_ISL_4105115, EPI_ISL_4105116, EPI_ISL_4105117, EPI_ISL_4105118, EPI_ISL_4105119, EPI_ISL_4105120, EPI_ISL_4105121, EPI_ISL_4105122, EPI_ISL_4105123, EPI_ISL_4105124, EPI_ISL_4105125, EPI_ISL_4105126, EPI_ISL_4105127, EPI_ISL_4105128, EPI_ISL_4105129, EPI_ISL_4105130, EPI_ISL_4105131, EPI_ISL_4105132, EPI_ISL_4105133, EPI_ISL_4105134, EPI_ISL_4105135, EPI_ISL_4105136, EPI_ISL_4105137, EPI_ISL_4105138, EPI_ISL_4105139, EPI_ISL_4105140, EPI_ISL_4105141, EPI_ISL_4105142, EPI_ISL_4105143, EPI_ISL_4105144, EPI_ISL_4105145, EPI_ISL_4105146, EPI_ISL_4105147, EPI_ISL_4105148, EPI_ISL_4105149, EPI_ISL_4105150, EPI_ISL_4105151, EPI_ISL_4105152, EPI_ISL_4105153, EPI_ISL_4105154, EPI_ISL_4105155, EPI_ISL_4105156, EPI_ISL_4105157, EPI_ISL_4105158, EPI_ISL_4105159, EPI_ISL_4105160, EPI_ISL_4105161, EPI_ISL_4105162, EPI_ISL_4105163, EPI_ISL_4105164, EPI_ISL_4105165, EPI_ISL_4105166, EPI_ISL_4105167, EPI_ISL_4105168, EPI_ISL_4105169, EPI_ISL_4105170, EPI_ISL_4105171, EPI_ISL_4105172, EPI_ISL_4105173, EPI_ISL_4105174, EPI_ISL_4105175, EPI_ISL_4105176, EPI_ISL_4105177, EPI_ISL_4105178, EPI_ISL_4105179, EPI_ISL_4105180, EPI_ISL_4105181, EPI_ISL_4105182, EPI_ISL_4105183, EPI_ISL_4105184, EPI_ISL_4105185, EPI_ISL_4105186, EPI_ISL_4105187, EPI_ISL_4105188, EPI_ISL_4105189, EPI_ISL_4105190, EPI_ISL_4105191, EPI_ISL_4105192, EPI_ISL_4105193, EPI_ISL_4105194, EPI_ISL_4105195, EPI_ISL_4105196, EPI_ISL_4105197, EPI_ISL_4105198, EPI_ISL_4105199, EPI_ISL_4105200, EPI_ISL_4105201, EPI_ISL_4105202, EPI_ISL_4105203, EPI_ISL_4105204, EPI_ISL_4105205, EPI_ISL_4105206, EPI_ISL_4105207, EPI_ISL_4105208, EPI_ISL_4105209, EPI_ISL_4105210, EPI_ISL_4105211, EPI_ISL_4105212, EPI_ISL_4105213, EPI_ISL_4105214, EPI_ISL_4105215, EPI_ISL_4105216, EPI_ISL_4105217, EPI_ISL_4105218, EPI_ISL_4105219, EPI_ISL_4105220, EPI_ISL_4105221, EPI_ISL_4105222, EPI_ISL_4105223, EPI_ISL_4105224, EPI_ISL_4105225, EPI_ISL_4105226, EPI_ISL_4105227, EPI_ISL_4105228, EPI_ISL_4105229, EPI_ISL_4105230, EPI_ISL_4105231, EPI_ISL_4105232, EPI_ISL_4105233, EPI_ISL_4105234, EPI_ISL_4105235, EPI_ISL_4105236, EPI_ISL_4105237, EPI_ISL_4105238, EPI_ISL_4105239, EPI_ISL_4105240, EPI_ISL_4105241, EPI_ISL_4105242, EPI_ISL_4105243, EPI_ISL_4105244, EPI_ISL_4105245, EPI_ISL_4105246, EPI_ISL_4105247, EPI_ISL_4105248, EPI_ISL_4105249, EPI_ISL_4105250, EPI_ISL_4105251, EPI_ISL_4105252, EPI_ISL_4105253, EPI_ISL_4105254, EPI_ISL_4105255, EPI_ISL_4105256, EPI_ISL_4105257, EPI_ISL_4105258, EPI_ISL_4105259, EPI_ISL_4105260, EPI_ISL_4105261, EPI_ISL_4105262, EPI_ISL_4105263, EPI_ISL_4105264, EPI_ISL_4105265, EPI_ISL_4105266, EPI_ISL_4105267, EPI_ISL_4105268, EPI_ISL_4105269, EPI_ISL_4105270, EPI_ISL_4105271, EPI_ISL_4105272, EPI_ISL_4105273, EPI_ISL_4105274, EPI_ISL_4105275, EPI_ISL_4105276, EPI_ISL_4105277, EPI_ISL_4105278, EPI_ISL_4105279, EPI_ISL_4105280, EPI_ISL_4105281, EPI_ISL_4105282, EPI_ISL_4105283, EPI_ISL_4105284, EPI_ISL_4105285, EPI_ISL_4105286, EPI_ISL_4105287, EPI_ISL_4105288, EPI_ISL_4105289, EPI_ISL_4105290, EPI_ISL_4105291, EPI_ISL_4105292, EPI_ISL_4105293, EPI_ISL_4105294, EPI_ISL_4105295, EPI_ISL_4105296, EPI_ISL_4105297, EPI_ISL_4105298, EPI_ISL_4105299, EPI_ISL_4105300, EPI_ISL_4105301, EPI_ISL_4105302, EPI_ISL_4105303, EPI_ISL_4105304, EPI_ISL_4105305, EPI_ISL_4105306, EPI_ISL_4105307, EPI_ISL_4105308, EPI_ISL_4105309, EPI_ISL_4105310, EPI_ISL_4105311, EPI_ISL_4105312, EPI_ISL_4105313, EPI_ISL_4105314, EPI_ISL_4105315, EPI_ISL_4105316, EPI_ISL_4105317, EPI_ISL_4105318, EPI_ISL_5032792, EPI_ISL_5032793, EPI_ISL_5032794, EPI_ISL_5032795, EPI_ISL_5032796, EPI_ISL_5032797, EPI_ISL_5032798, EPI_ISL_5032799, EPI_ISL_5032800, EPI_ISL_5032801, EPI_ISL_5032802, EPI_ISL_5032803, EPI_ISL_5032804, EPI_ISL_5032805, EPI_ISL_5032806, EPI_ISL_5032807, EPI_ISL_5032808, EPI_ISL_5032809, EPI_ISL_5032810, EPI_ISL_5032811, EPI_ISL_5032812, EPI_ISL_5032813, EPI_ISL_5032814, EPI_ISL_5032815, EPI_ISL_5032816, EPI_ISL_5032817, EPI_ISL_5032818, EPI_ISL_5032819, EPI_ISL_5032820, EPI_ISL_5032821, EPI_ISL_5032822, EPI_ISL_5032823, EPI_ISL_5032824, EPI_ISL_5032825, EPI_ISL_5032826, EPI_ISL_5032827, EPI_ISL_5032828, EPI_ISL_5032829, EPI_ISL_5032830, EPI_ISL_5032831, EPI_ISL_5032832, EPI_ISL_5032833, EPI_ISL_5032834, EPI_ISL_5032835, EPI_ISL_5032836, EPI_ISL_5032837, EPI_ISL_5032838, EPI_ISL_5032839, EPI_ISL_5032840, EPI_ISL_5032841, EPI_ISL_5032842, EPI_ISL_5032843, EPI_ISL_5032844, EPI_ISL_5032845, EPI_ISL_5032846, EPI_ISL_5032847, EPI_ISL_5032848, EPI_ISL_5032849, EPI_ISL_5032850, EPI_ISL_5032851, EPI_ISL_5032852, EPI_ISL_5032853, EPI_ISL_5032854, EPI_ISL_5032855, EPI_ISL_5032856, EPI_ISL_5032857, EPI_ISL_5032858, EPI_ISL_5032859, EPI_ISL_5032860, EPI_ISL_5032861, EPI_ISL_5032862, EPI_ISL_5032863, EPI_ISL_5032864, EPI_ISL_5032865, EPI_ISL_5032866, EPI_ISL_5032867, EPI_ISL_5032868, EPI_ISL_5032869, EPI_ISL_5032870, EPI_ISL_5032871, EPI_ISL_5032872, EPI_ISL_5032873, EPI_ISL_5032874, EPI_ISL_5032875, EPI_ISL_5032876, EPI_ISL_5032877, EPI_ISL_5032878, EPI_ISL_5032879, EPI_ISL_5032880, EPI_ISL_5032884, EPI_ISL_5032885, EPI_ISL_5032886, EPI_ISL_5032887, EPI_ISL_5032888 | Communicable Disease Laboratory, Public Health Directorate | Communicable Disease Laboratory, Public Health Directorate | AlAbbas, Z.; AlHujairi, Z.; Almoamen, G.; Altaif, Z.; Alwasti, H.; Marhoon, A.; Touq, M. |
| see above                                                                                                                                                                                                                                                                                                                                                                                                                                                                                                                                                                                                                                                                                                                                                                                                                                                                                                                                                                                                                                                                                                                                                                                                                                                                                                                                                                                                                                                                                                                                                                                                                                                                                                                                                                                                                                                                                                                                                                                                                                                                                                                                                                                                                                                                                                                                                                                                                                                                                                                                                                                                                                                                                                                                                                                                                                                                                                                                                                                                                                                                                                                                                                                                                                                                                                                                                                                                                                                                                                                                                                                                                                                                                                                                                                                                                                                                                                                                                                                                                                                                                                                                                                                                                                                                                                                                                                                                                                                                                                                                                                                                                                                                                                                                                                                                                                                                                                                                                                                                                                                                                                                                                                                                                                                                                                                                                                                                                                                                                                                                                                                                                                                                       |                                                            |                                                            |                                                                                          |
